# Supplementary material
Source: PubMed Central journal article supplement (PMC7108201)
Supplement: mosca.pdf [file mosca.pdf]

## I "microarray" a proteine per una medicina personalizzata

Xiaobo Yu, Nicole Schneiderhan-Marra, Thomas O. Joos

NMI Natural and Medical Sciences Institute, University of Tuebingen, Reutlingen, Germany

Traduzione a cura di Renata Paleari e Andrea Mosca

### ABSTRACT

**Protein microarrays for personalized medicine.** Over the last 10 years, DNA microarrays have achieved a robust analytical performance, enabling their use for analyzing the whole transcriptome or for screening thousands of single-nucleotide polymorphisms in a single experiment. DNA microarrays allow scientists to correlate gene expression signatures with disease progression, to screen for disease-specific mutations, and to treat patients according to their individual genetic profiles; however, the real key is proteins and their manifold functions. It is necessary to achieve a greater understanding of not only protein function and abundance but also their role in the development of diseases. Protein concentrations have been shown to reflect the physiological and pathologic state of an organ, tissue, or cells far more directly than DNA, and proteins can be profiled effectively with protein microarrays, which require only a small amount of sample material. Protein microarrays have become well-established tools in basic and applied research, and the first products have already entered the *in vitro* diagnostics market. This review focuses on protein microarray applications for biomarker discovery and validation, disease diagnosis, and use within the area of personalized medicine. Protein microarrays have proved to be reliable research tools in screening for a multitude of parameters with only a minimal quantity of sample and have enormous potential in applications for diagnostic and personalized medicine.

### INTRODUZIONE

Il progetto di sequenziamento del genoma umano ha posto le basi per lo sviluppo dei "microarray" a DNA, cosa che ha permesso lo studio parallelo su larga scala della produzione di mRNA e l'analisi dei polimorfismi a singolo nucleotide. Dopo il completamento nel 2003 del Progetto Genoma Umano, le tecnologie a "microarray" di DNA si sono sviluppate molto rapidamente ed evolute in strumenti robusti e affidabili per la ricerca genomica. L'analisi multivariata sistematica dei dati di espressione dell'intero genoma permette la valutazione delle correlazioni tra quadri di espressione genica e stadio e progressione di una malattia, rendendo possibili trattamenti specifici per ogni paziente basati su profili genetici individuali, in un settore noto come "farmacogenomica" o "medicina personalizzata" (Figura 1) (1, 2). Informazioni dettagliate riguardanti il genotipo o il profilo di espressione genica di un singolo paziente possono essere utilizzate per definire lo stato della malattia, scegliere le terapie più appropriate, aggiustarne il dosaggio secondo il fabbisogno del paziente o iniziare trattamenti preventivi. La medicina personalizzata ha

come scopo finale quello di implementare con successo le 5 G: "Giusto individuo "target", Giusta diagnosi, Giusto trattamento, Giusto farmaco, Giusto dosaggio" (3). Tale scopo può tuttavia essere raggiunto solo integrando le conoscenze genomiche con gli approcci clinici tradizionali, con l'anamnesi personale del paziente e la sua storia familiare, e con i dati clinici più rilevanti, quali i risultati delle tecniche di "imaging" e della diagnostica *in vitro*.

L'analisi dell'espressione genica non è ancora routinariamente applicata nella medicina personalizzata, sebbene gli studi dei profili di espressione genica abbiano dato vita a numerose ipotesi riguardo alla genesi dei tumori e abbiano anche fornito indicazioni potenzialmente prognostiche e predittive. A causa delle modificazioni post-traduzionali, quali glicosilazione, fosforilazione e acetilazione, le proteine sono più eterogenee dei geni che le codificano e tale eterogeneità spesso non è correlata al livello di produzione delle proteine medesime. Le modifiche post-traduzionali amplificano la funzione delle proteine in termini di capacità di riconoscimento, trasduzione del segnale e proteolisi, processi che regolano la differenziazione e/o

\*Questo articolo è stato tradotto con il permesso dell'American Association for Clinical Chemistry (AACC). AACC non è responsabile della correttezza della traduzione. Le opinioni presentate sono esclusivamente quelle degli Autori e non necessariamente quelle dell'AACC o di Clinical Chemistry. Tradotto da Clin Chem 2010;56:376-87 su permesso dell'Editore.

Copyright originale © 2010 American Association for Clinical Chemistry, Inc. In caso di citazione dell'articolo, riferirsi alla pubblicazione originale in Clinical Chemistry.

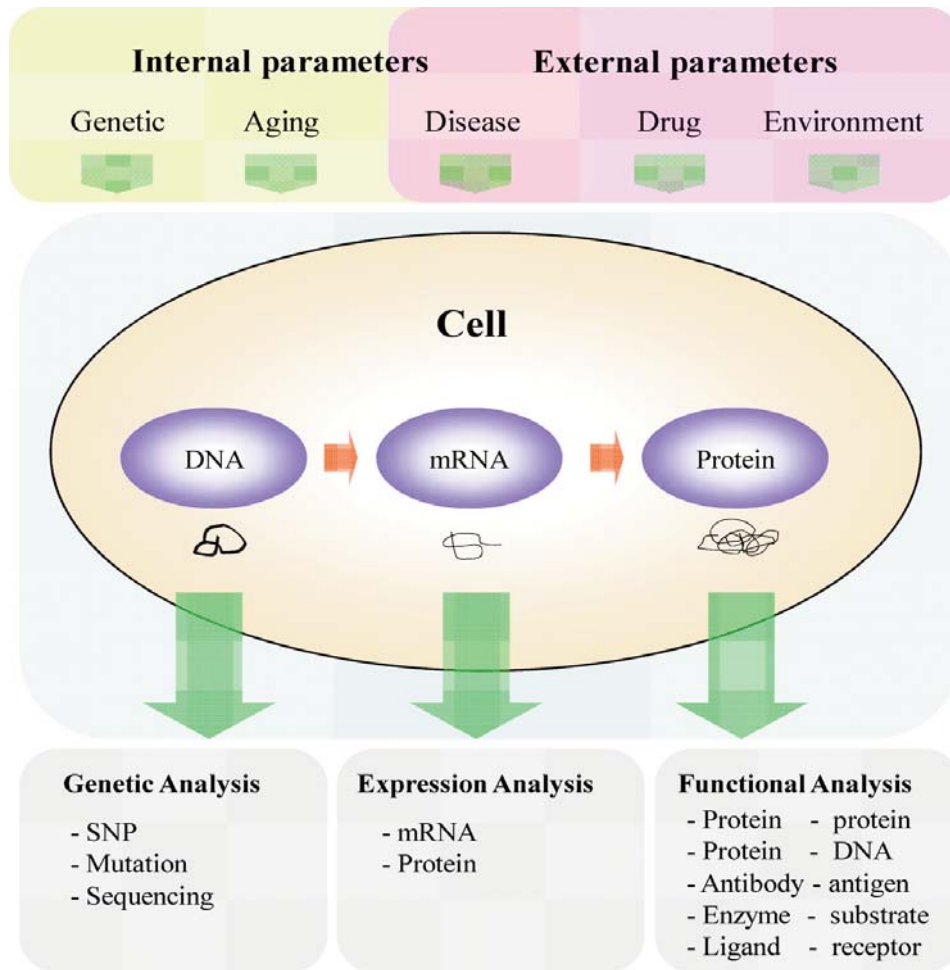

**Figura 1**

*Influenza di fattori interni ed esterni sullo stato fisiologico della cellula.*

*Le tecnologie a "microarray" possono essere applicate per sorvegliare i meccanismi intracellulari di espressione genica e di produzione delle proteine. I "microarray" a DNA sono utilizzati per le analisi dei geni e dei loro mRNA, mentre i "microarray" proteici sono impiegati per l'analisi della produzione delle proteine e per capirne la funzione.*

la proliferazione cellulare. Le proteine sono anche prodotte in maniera diversa nel corso delle malattie. Molti farmaci usati per trattare una malattia sono quindi diretti contro "target" proteici, come le proteinchinasi, le citochine, i recettori o i loro substrati che hanno dimostrato di giocare un ruolo chiave nello sviluppo della malattia (4). Le analisi proteomiche rappresentano quindi un modo più diretto per generare una serie di dati importanti per comprendere la malattia a livello del singolo individuo. L'analisi di quadri proteici o anche di intere vie di segnale può contribuire ad aumentare le nostre conoscenze sullo sviluppo e la progressione della malattia a livello molecolare, con la conseguente possibilità di porre diagnosi a livello individuale e aggiustare le terapie secondo i fabbisogni dei singoli pazienti. Tali analisi dettagliate richiedono tecniche proteomiche "multiplex" a elevata produttività in grado di esaminare una moltitudine di parametri a partire da minime quantità di materiale biologico. Le tecniche di "microarray" proteici sono quindi diventate un'area di ricerca molto affascinante (Figura 1) (5-8).

I "microarray" proteici possono essere raggruppati secondo diversi formati e tipologie di applicazione, come mostrato nelle Figure 2 e 3. I "microarray" proteici in fase diretta (FPPM) sono i formati più frequentemente utilizzati. Consistono in uno strato ordinato di molecole "di cattura" ben definite che permettono la valutazione simultanea di un grande numero di parametri in un singolo campione biologico. Esempi di FPPM sono i "microarray" ad anticorpi, che sono utilizzati per identificare e quantificare proteine bersaglio di interesse, e "array" di proteine di fusione immobilizzate, utilizzate per studiare le interazioni tra proteine e molecole di legame immobilizzate, quali altre proteine, peptidi, composti a basso PM, oligosaccaridi o DNA. Gli FPPM comportano l'immobilizzazione di molecole di cattura (peptidi, proteine o anticorpi) su di una superficie solida in righe e colonne (formato "microarray") al fine di catturare gli analiti corrispondenti presenti in campioni con matrice complessa, quali siero, plasma o surnatanti di colture cellulari. Gli analiti immobilizzati sono visualizzati sia per mezzo di marcatura diretta o tramite

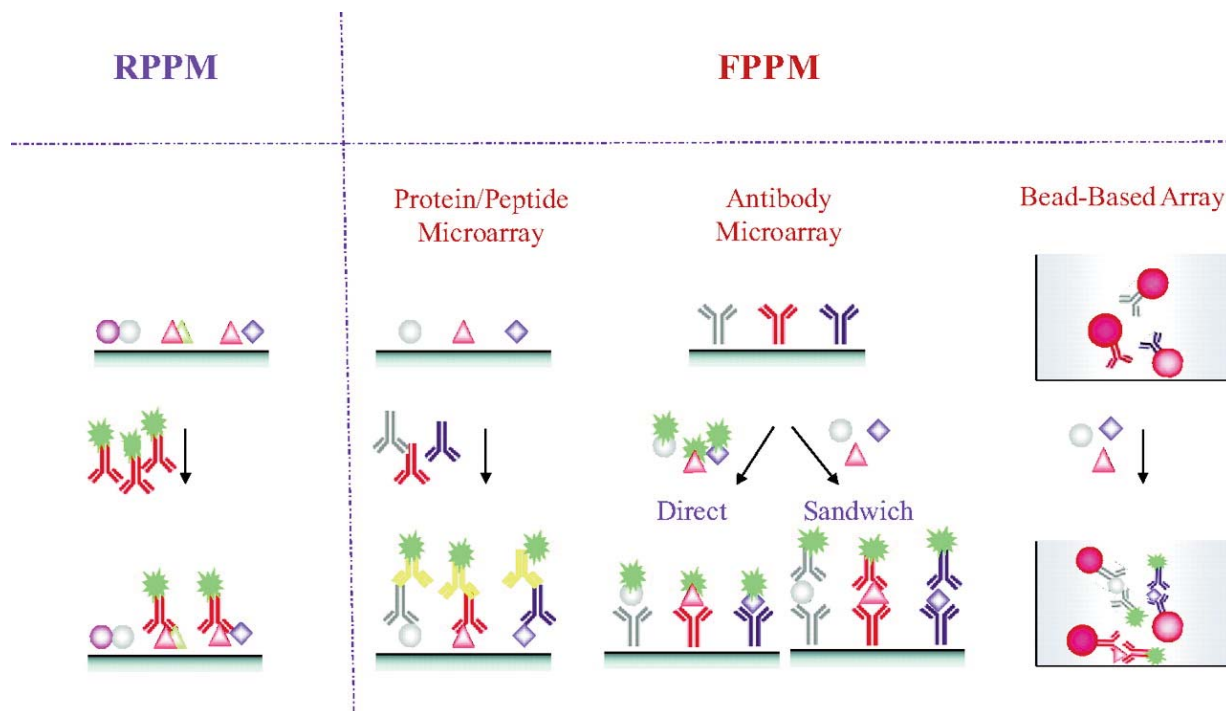

**Figura 2**

*Tipologie di formato dei “microarray” proteici.*

*I “microarray” proteici in fase inversa (RPPM) possono essere utilizzati per misurare una serie distinta di parametri su una ampia varietà di tessuti o lisati cellulari oppure per campionare frazioni immobilizzate in modo ordinato su un supporto solido. I “microarray” proteici in fase diretta (FPPM) si basano invece su un approccio immunochimico di marcatura diretta o a “sandwich” e possono essere utilizzati per analizzare simultaneamente diversi parametri su differenti campioni.*

anticorpi secondari marcati. I metodi classici di rilevazione includono fluorescenza, chemiluminescenza e colorimetria. I sistemi di “microarray” planari sono perfettamente adatti per generare “microarray” proteici ad alta intensità, che possono esaminare un gran numero di analiti in un singolo esperimento. Gli “array” a biglie forniscono un'alternativa interessante ai “microarray” planari, specialmente quando il numero di parametri da analizzare sia piuttosto limitato. Questi sistemi di “array” a biglie sono flessibili, robusti e più automatizzati e permettono ai ricercatori di esaminare migliaia di campioni in un tempo contenuto (10, 11). Sono attualmente disponibili in commercio molti sistemi FPPM, che permettono la misura di citochine e chemochine, biomarcatori tumorali e molecole coinvolte in vie di trasduzione del segnale (Tabelle 1 e 2).

L'altro formato di esame, i “microarray” proteici a fase inversa (RPPM), consiste in una moltitudine di differenti campioni, quali tessuti o lisati cellulari, che sono immobilizzati come singole “spot” su un supporto solido. Ogni “spot” contiene l'intero proteoma di un tessuto o di una cellula. Anticorpi altamente specifici sono utilizzati per cercare la presenza o l'assenza di distinte proteine bersaglio negli “spot” da valutare. Questo approccio permette l'identificazione di una serie di proteine prodotte da un ampio numero di tessuti o campioni cellulari, come mostrato nelle Figure 2 e 3 (11, 12). Tipicamente, le molecole di interesse, quali fattori trascrizionali o molecole di segnale, sono generalmente

presenti in piccolissima quantità e pertanto sono necessari metodi di rivelazione molto sensibili, quali quelli basati sull'amplificazione del segnale con tiramide oppure tecnologie a guide d'onda planari (13, 14). Gli RPPM sono stati utilizzati con successo in vari studi sullo sviluppo dei tumori, utilizzando sia cellule che campioni di pazienti.

La Tabella 3 riassume le principali caratteristiche dei diversi formati di “microarray” proteici.

Il rimanente di questa rassegna prende in esame gli attuali progressi nell'uso di “microarray” proteici per la scoperta di nuovi biomarcatori e per la loro validazione. Verrà inoltre passato in rassegna il loro impiego nella diagnostica *in vitro* e discussi i possibili impieghi nel campo della medicina personalizzata.

**“MICROARRAY” A PROTEINE E MEDICINA PERSONALIZZATA**

Le tradizionali tecnologie per l'analisi di DNA, mRNA e proteine possono analizzare solo un parametro alla volta e pertanto hanno una produttività limitata quando è necessario valutare un grande numero di parametri. L'implementazione dei “microarray” a DNA e a proteine ha portato a un'impressionante accelerazione nella scoperta di nuovi biomarcatori, con il fine ultimo di identificarne un numero specifico per le diverse patologie e quindi di combinarli in una tecnologia di screening sufficientemente robusta. Questo approccio

**Tabella 1**

*Sistemi immunochimici miniaturizzati e in parallelo disponibili commercialmente, basati sulla tecnologia dei "microarray" proteici planari.*

| Azienda                  | Prodotto                                                                                       | Applicazione                                                                           |
|--------------------------|------------------------------------------------------------------------------------------------|----------------------------------------------------------------------------------------|
| Arrayit                  | PlasmaScan Antibody Microarrays                                                                | Profilo proteico comparativo                                                           |
| Clontech Laboratories    | Ab Microarray 500 & Express Buffer kit                                                         | Profilo proteico comparativo                                                           |
| EMD Chemicals            | InnoCyte 96-well cell adhesion array                                                           | Saggio immunochimico multiplo, adesione cellulare                                      |
| Millipore                | EpiTag phosphorylation profiling chips                                                         | Profilo di fosforilazione                                                              |
| Eurogentec               | Antibody microarrays                                                                           | Profilo proteico comparativo, profilo di fosforilazione                                |
| Full Moon BioSystems     | Antibody microarrays                                                                           | Profilo proteico comparativo, profilo di fosforilazione                                |
| GenTel BioSciences       | APIX and PANDEIA antibody microarray multiplexed immunoassays                                  | Profilo proteico comparativo                                                           |
| Hypromatrix              | Signal Transduction AntibodyArray                                                              | Profilo proteico comparativo, interazioni proteina-proteina, profilo di fosforilazione |
| Invitrogen               | ProtoArray Human Protein microarray                                                            | Profilo di autoanticorpi, interazioni proteina-proteina                                |
| Panomics                 | Human antibody arrays                                                                          | Saggio immunochimico multiplo                                                          |
| R&D Systems              | MAP Kinase Array kit, Proteome Profiler Human Pluripotent Stem Cell Array kit (antibody array) | Profilo proteico comparativo, fosforilazione proteica                                  |
| Randox Laboratories      | Biochip immunoassays                                                                           | Saggio immunochimico multiplo                                                          |
| RayBiotech               | Phosphorylation antibody arrays, quantitative antibody arrays                                  | Profilo proteico comparativo, saggio immunochimico multiplo                            |
| Sigma-Aldrich            | Antibody microarray - XPRESS Profiler725 kit                                                   | Profilo proteico comparativo                                                           |
| Spring Bioscience        | Antibody microarrays                                                                           | Profilo proteico comparativo                                                           |
| Quansys Biosciences      | Multiplexed ELISA assay                                                                        | Saggio immunochimico multiplo                                                          |
| Thermo Fisher Scientific | Thermo Scientific Pierce antibody array                                                        | Saggio immunochimico multiplo                                                          |
| US Biomax                | Antibody microarray                                                                            | Profilo proteico comparativo                                                           |

**Tabella 2**

*Sistemi immunochimici miniaturizzati e in parallelo disponibili commercialmente, basati sulla tecnologia dei "microarray" proteici su biglia*

| Azienda              | Prodotto                           | Applicazione                  |
|----------------------|------------------------------------|-------------------------------|
| Bio-Rad Laboratories | Bio-Plex x-Plex assays             | Saggio immunochimico multiplo |
| EMD Chemicals        | WideScreen biomarker assays        | Saggio immunochimico multiplo |
| Invitrogen           | Multiple cytokine panel assays     | Saggio immunochimico multiplo |
| Millipore            | MILLIPLEX MAP cytokine assays      | Saggio immunochimico multiplo |
| Panomics             | Procarta cytokine-profiling assays | Saggio immunochimico multiplo |
| R&D Systems          | Human Fluorokine MAP assays        | Saggio immunochimico multiplo |
| Rules-Based Medicine | HumanMAP multiplexed assays        | Saggio immunochimico multiplo |

**Tabella 3**

*Caratteristiche dei differenti tipi di "microarray" a proteine*

|                        | RPPM                        | FPPM                          |                               |
|------------------------|-----------------------------|-------------------------------|-------------------------------|
|                        |                             | Planari                       | Basati su biglie              |
| Immobilizzazione       | Lisati di cellule o tessuti | Peptidi, proteine o anticorpi | Peptidi, proteine o anticorpi |
| Marcatura dell'analita | Assente                     | Presente o assente            | Presente o assente            |
| Quantificazione        | Relativa                    | Relativa o assoluta           | Relativa o assoluta           |
| Numero di "spot"       | >1000                       | >1000                         | ≤100                          |
| Produttività           | Bassa                       | Bassa                         | Alta                          |
| Automazione            | Bassa                       | Bassa                         | Alta                          |

permetterà ai clinici di esaminare i loro pazienti prima di prescrivere un particolare farmaco al fine di escludere possibili effetti avversi o per determinarne il miglior dosaggio. Al di là dei miglioramenti nella tecnologia, i ricercatori devono anche identificare e validare la serie più appropriata di biomarcatori e quindi integrarli nei servizi sanitari. La Figura 3 riassume le fasi per la scoperta di biomarcatori mediante i “microarray” a proteine e la conseguente possibile applicazione per una medicina personalizzata.

Evidenze recenti provano che i “microarray” a proteine hanno un incredibile potenziale nel campo della scoperta dei biomarcatori. Gli RPPM sono stati utilizzati per identificare biomarcatori candidati in pazienti con tumori, nei quali si è provato che la concentrazione di tali molecole correlava con lo stadio e la progressione della malattia (15-20). In particolare, i sistemi immunochimici a “sandwich” si sono dimostrati metodi eccellenti per quantificare accuratamente alcuni biomarcatori candidati. Sistemi “multiplexing” possono

essere facilmente sviluppati utilizzando la tecnologia a biglie. Tali sistemi, dotati di alta produttività, sono perfettamente adatti per esaminare biomarcatori tumorali su un gran numero di campioni clinici (21, 22) e permettono di sviluppare nuove conoscenze riguardo alla produzione di proteine plasmatiche o tissutali, fornendo quindi informazioni dettagliate sulle condizioni fisiopatologiche dei pazienti. L'utilizzo di strumenti bioinformatici sofisticati permette l'identificazione di quadri di biomarcatori che possono poi essere utilizzati a fini diagnostici. I dati ottenuti con sistemi immunochimici “multiplex” possono poi essere integrati in modelli diagnostici multivariati con algoritmi tipo “K-nearest neighbor” e regressione logistica. Tali indagini possono significativamente migliorare sensibilità e specificità diagnostica in campo neoplastico, rispetto a quanto finora possibile con analisi su singoli parametri (23-25). Recentemente, Visintin et al. (23) hanno impiegato un sistema immunochimico “multiplex sandwich” a 6 parametri [leptina, prolattina,

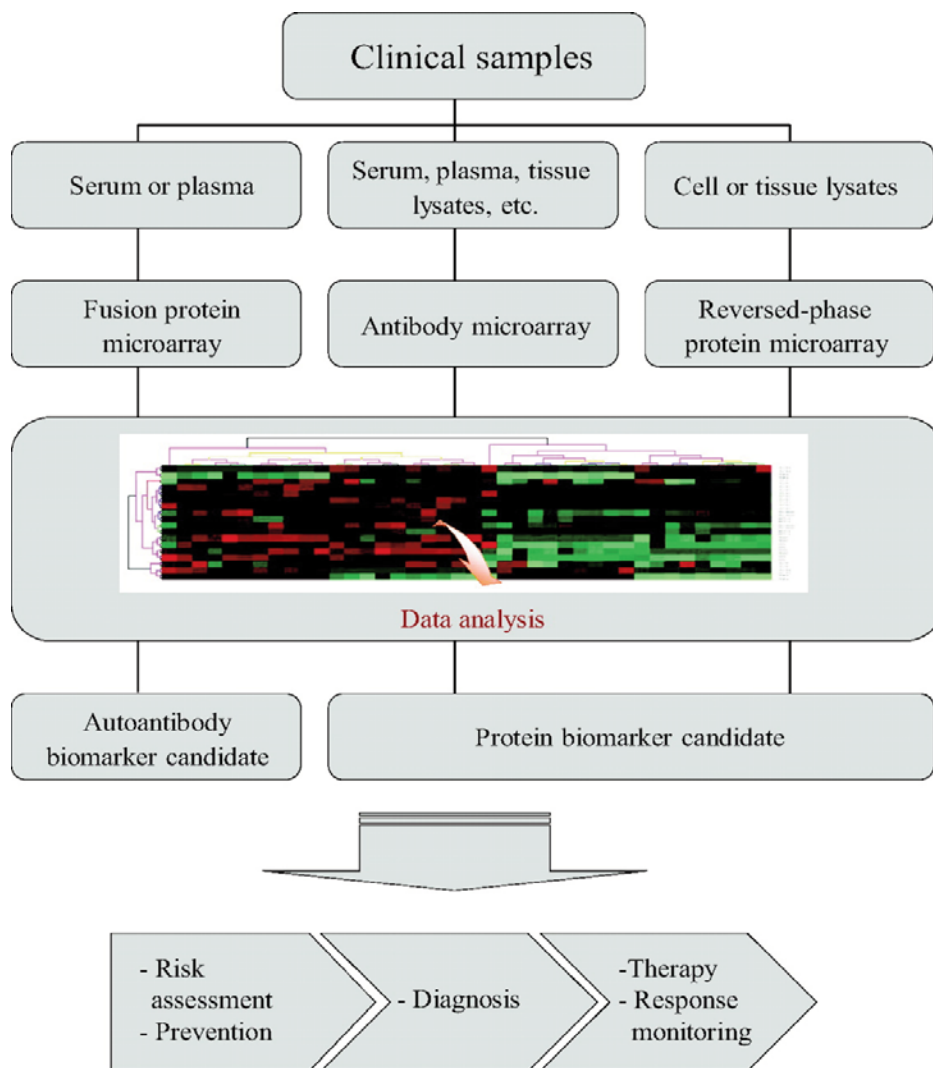

**Figura 3**  
Fasi nell'applicazione dei “microarray” proteici alla scoperta di biomarcatori e al loro impiego nella medicina personalizzata.

osteopontina, "insulin-like growth factor II", fattore inibitorio dei macrofagi e antigene carboidratico 125 (CA 125)] per studiare campioni plasmatici di pazienti con tumore ovarico. L'utilizzo di questo pannello su 362 controlli sani e 156 pazienti con tumore ovarico neo-diagnosticato ha portato a una sensibilità diagnostica del 95,3% unita a una specificità diagnostica del 99,4% (23). Amonkar et al. (25) hanno elaborato un sistema a 11 parametri [CA 125, CA 19.9, "soluble epidermal growth factor receptor" (EGFR), proteina C-reattiva, mioglobina, apolipoproteina A-I (apo A1), apolipoproteina C-III, proteina  $1\alpha$  inibitoria dei macrofagi (MIP- $1\alpha$ ), interleuchina (IL) 6, IL 18 e tenascina C] e l'hanno utilizzato per differenziare campioni plasmatici di 176 pazienti con tumore ovarico e 187 controlli con condizioni benigne. I dati hanno dimostrato sensibilità e specificità diagnostiche attorno al 90% (24, 25). Utilizzando invece un singolo parametro (CA 125), la sensibilità diagnostica nei primi stadi della malattia non supera il 60% (23). Questi pannelli di possibili biomarcatori richiedono ovviamente ulteriori validazioni su casistiche più ampie prima che possano essere utilizzati nella diagnostica clinica. Tuttavia, la crescente lista di potenziali biomarcatori dimostra che i "microarray" a proteine possiedono un grande potenziale per contribuire allo sviluppo di terapie mediche individualizzate. Le conoscenze generate tramite tali "microarray" a proteine non solo aiuteranno i clinici ad adattare le terapie secondo i fabbisogni individuali dei pazienti, ma serviranno anche a minimizzare il rischio di effetti avversi causati da un farmaco sbagliato o da un dosaggio farmacologico inappropriato.

### I "MICROARRAY" A PROTEINE PER LA SCOPERTA DI NUOVI BIOMARCATORI

I "microarray" a proteine rendono possibile una quantificazione parallela e massiva di potenziali nuovi biomarcatori, in brevissimo tempo da un gran numero di campioni biologici. L'analisi per "cluster" di questa serie di dati può quindi mettere in rilievo indizi che correlano con lo stadio della malattia (26). Le tre principali applicazioni dei "microarray" a proteine per la scoperta di nuovi biomarcatori sono rappresentate dall'approccio basato sui dati sperimentali, dall'approccio basato sulle conoscenze e dall'approccio basato sulla biologia dei sistemi.

#### Approccio basato sui dati sperimentali

Questo approccio comporta un'analisi di tutto il proteoma per identificare una correlazione tra la concentrazione di una particolare proteina e la presenza di una specifica malattia. L'approccio è assolutamente obiettivo dal momento che non vengono fatte alcune assunzioni relativamente alle proteine che possono essere coinvolte nel processo patologico. Questo tipo di "microarray" per l'analisi globale delle concentrazioni proteiche è tuttavia ancora agli esordi; infatti, il

combinare le attuali tecniche di "array" con anticorpi con la strategia di marcatura diretta dei campioni permette l'analisi di un numero limitato di parametri. Inoltre, nonostante gli sforzi fatti per lo sviluppo di anticorpi ricombinanti e le opportunità offerte dalle classiche vie di produzioni di anticorpi, la disponibilità di anticorpi di elevata qualità diretti contro ogni singola proteina di interesse è ancora molto limitata (27, 28).

Ciononostante, tecniche ad elevata produttività per l'analisi proteica sono state utilizzate per generare "microarray" per l'intero proteoma con migliaia di proteine ricombinanti (29-32). I "microarray" ad alta densità di proteine rappresentano un approccio basato su dati sperimentali che permette di identificare nuovi autoanticorpi che sono specifici per una varietà di malattie (7, 33). Hudson et al. hanno utilizzato un "microarray" a proteine che conteneva 5005 proteine umane per identificare una serie di autoanticorpi capaci di riconoscere 94 antigeni nei sieri di pazienti con tumore ovarico (30). Quattro di questi antigeni sono poi stati confermati con analisi mediante "immunoblot" e "microarray" con tessuti. I ricercatori hanno trovato che la lamina A/C, la proteina 1 di ricognizione strutturale-specifica (SSRP1) e la proteina 1 che lega Ral ("Ral-binding protein 1") venivano prodotte in maggiori quantità nei tessuti cancerosi rispetto ai tessuti controllo. Inoltre, specificità e sensibilità diagnostica della lamina A/C e di SSRP1 combinate erano superiori a quelle del CA 125 nell'identificare il tumore ovarico.

Lo stesso approccio è stato usato per valutare la risposta immunitaria alle proteine patogeniche. Zhu et al. (34) hanno prodotto un "microarray" per le proteine di coronavirus contenente 82 proteine purificate da coronavirus della sindrome respiratoria acuta (SARS) e 5 altri coronavirus, con lo scopo di monitorare la risposta immunitaria dei pazienti affetti da SARS. Sono stati quindi esaminati 400 campioni di siero provenienti dall'epidemia canadese di SARS, che includevano casi di SARS da coronavirus certa, casi di pazienti con insufficienza respiratoria e lavoratori di area sanitaria in buono stato di salute. L'analisi bioinformatica dei dati ha portato a una corretta classificazione dei campioni nel 91% dei casi (90% di sensibilità diagnostica e 93% di specificità diagnostica) (34). Questo studio ha quindi dimostrato molto bene che i "microarray" a proteine possono essere utilizzati per la identificazione su larga scala di anticorpi specifici per i virus nei sieri dei pazienti. Schmidt et al. (35) hanno prodotto un "microarray" contenente 251 proteine, pari al 92% del proteoma del virus vaccinicco, e lo hanno utilizzato per esaminare i sieri di 20 soggetti vaccinati e di altri 20 soggetti non vaccinati. Questi Autori hanno potuto dimostrare che la risposta anticorpale primaria alle singole proteine virali variava da individuo a individuo, ma che il numero totale di proteine riconosciute dagli anticorpi era solo lievemente variato dopo la seconda vaccinazione (35). Questi dati hanno quindi dimostrato che i "microarray" a proteine potrebbero servire a misurare la risposta immune umorale ai vaccini e fornire un semplice approccio per valutare vaccini di nuova produzione.

### Approccio basato sulle conoscenze

Nell'approccio basato sulle conoscenze, che rappresenta un approccio proteomico mirato, i biomarcatori potenzialmente importanti per una determinata patologia vengono ricercati sulla base delle conoscenze scientifiche disponibili. Gli svantaggi di questo approccio sono che i risultati ottenibili sono dipendenti dalle attuali conoscenze scientifiche e che c'è quindi il rischio di ignorare biomarcatori sconosciuti. Ciò nonostante, l'approccio basato sulle conoscenze è ancora la migliore strategia quando si desidera esaminare analiti quali proteine della fase acuta, molecole di vie di trasduzione del segnale e autoanticorpi (36-38). Le citochine e le chemochine, che regolano una moltitudine di attività cellulari, incluse la migrazione cellulare, la proliferazione e l'apoptosi, e che quindi giocano un ruolo importante nei processi infiammatori ed in diversi tipi di tumore (39-41), sono le principali proteine utilizzate in questi studi (42, 43).

### Biomarcatori diagnostici

La malattia nodulare tiroidea, che interessa il 50% dei soggetti con più di 50 anni di età, è caratterizzata dalla presenza di uno o più noduli all'interno della ghiandola tiroidea. Oltre il 90% dei noduli tiroidei non sono dolorosi o cancerosi, ma, se viene diagnosticato il cancro, il trattamento deve essere iniziato il più presto possibile. La biopsia con ago sottile è il metodo diagnostico standard, ma il 30% dei risultati ottenuti con la biopsia non è soddisfacente. Linkov et al. hanno utilizzato la tecnologia xMAP, basata sull'uso delle biglie, per identificare un pattern di 19 citochine, chemochine e fattori di crescita plasmatici, che correlano con le patologie tiroidee benigne e maligne (44). L'analisi univariata dei risultati ottenuti ha provato che 5 fattori [il fattore di crescita epiteliale (EGF), il fattore di crescita epatocitario (HGF), IL 5, IL 8 e RANTES ("regulated upon activation, normally T-expressed and presumably secreted")] erano in grado di distinguere i soggetti con malattia alla tiroide dal gruppo di soggetti di controllo. La ulteriore analisi multivariata ha poi dimostrato che un pannello di 4 parametri (IL 8, HGF, "monocyte-induced  $\gamma$ -interferon", IL 12p40) era in grado di discriminare tra stati benigni e maligni (area sotto la curva ROC pari a 0,81; 95% intervallo di confidenza, 0,65-0,90). Questo risultato dimostra che gli "array" a proteine che utilizzano pannelli di biomarcatori plasmatici o sierici rappresentano uno strumento promettente di aiuto nella diagnostica delle malattie tiroidee nodulari.

Sauer et al. hanno utilizzato "array" proteici per meglio caratterizzare biopsie ad ago sottile da pazienti con tumore della mammella al fine di identificare un pannello di biomarcatori utili per definire specifici sottogruppi di pazienti con cancro (45). Alcuni lisati preparati da biopsie a nucleo grosso ("large-core biopsy") di carcinomi invasivi delle mammella erano studiati con metodiche immunochimiche a biglie al fine di valutare la produzione di 54 proteine preselezionate. I

risultati ottenuti hanno dimostrato che i profili di 5 proteine nel tessuto tumorale (fattore 2 di crescita dei fibroblasti, Fas, Fas ligand, inibitore tissutale della metalloproteinasi 1 e RANTES) variavano considerevolmente fra i gruppi di pazienti con o senza metastasi linfonodari ascellari. Kim et al. hanno utilizzato un approccio simile per distinguere pazienti col tumore della mammella da volontari sani (46). Questi Autori hanno selezionato 35 analiti da 4500 campioni di plasma preventivamente esaminati, ottenuti da pazienti con diversi tipi di tumori. Tre biomarcatori (EGF, ligando solubile di CD40 e pro-apo A1) sono stati trovati con concentrazioni aumentate nei campioni di plasma delle pazienti con tumore mammario. Si sono trovati anche 6 biomarcatori [chitinogeno ad alto PM, apo A1, molecola solubile di adesione cellulare vascolare 1 (VCAM-1), inibitore 1 dell'attivatore del plasminogeno, proteina legante la vitamina D e vitronectina] che erano presenti in concentrazioni plasmatiche diminuite. Erano quindi usati diversi algoritmi per generare modelli diagnostici, che hanno permesso di differenziare pazienti con tumore della mammella dai controlli sani, con un elevato grado di accuratezza diagnostica (91,8% mediante "random forest analysis", 91,5% con analisi di supporto tramite vettori e 87,6% mediante analisi discriminante lineare).

### Biomarcatori prognostici

C'è un gran bisogno di identificare biomarcatori specifici per la sepsi che possano riflettere lo stadio e la gravità di questo stato infiammatorio. Bozza et al. hanno impiegato alcuni sistemi immunochimici a "sandwich" miniaturizzati per valutare i valori predittivi dei profili di produzione di diverse citochine nel corso di sepsi (47). Essi hanno scoperto che le concentrazioni di alcune citochine aumentano col progredire della gravità dello stato infiammatorio e in parallelo con la perdita di funzionalità d'organo. In particolare, con riguardo a quest'ultima, si è potuto osservare che le concentrazioni di due su 17 citochine esaminate, IL 8 e proteina 1 di chemoattrazione monocitaria (MCP-1), misurate in prima giornata, correlavano significativamente con il punteggio di valutazione di insufficienza d'organo ("sequential organ failure assessment score"). L'aumento entro le prime 24 ore delle concentrazioni plasmatiche di IL 6, IL 8 e del fattore di stimolazione delle colonie granulocitarie correlava con la disfunzione d'organo, che non recuperava in terza giornata. Inoltre, le concentrazioni di 6 citochine (IL 1 $\beta$ , IL 4, IL 6, IL 8, MCP-1 e fattore di stimolazione delle colonie granulocitarie) erano in grado di predire una mortalità precoce.

Torrence et al. hanno usato un modello di topo (*mdr1a<sup>-/-</sup>*) affetto da malattia infiammatoria intestinale (IBD) scatenata da infezione da *Helicobacter bilis* per identificare biomarcatori sierici degli stati precoci e tardivi di IBD (48). L'analisi multivariata dei dati ha dimostrato un aumento di 5 proteine plasmatiche [IL 11, IL 17, "10-kDa interferon  $\gamma$ -inducibile protein" (IP-10), linfotattina, MCP-1 e VCAM-1] negli stadi precoci della IBD, mentre 11 proteine (IL 11, IP-10, aptoglobina, metalloproteinasi

9 della matrice, MIP-1 $\gamma$ , fibrinogeno, IgA, MIP-3 $\beta$ , VCAM-1, apo A1 e IL 18) mostravano concentrazioni elevate negli stadi tardivi della malattia. Le concentrazioni di tutti questi biomarcatori, tranne l'apo A1, correlavano con i punteggi della graduazione istopatologica. Il trattamento con antibiotici migliorava l'andamento clinico della IBD e portava a una progressiva diminuzione nelle concentrazioni plasmatiche di molti di tali biomarcatori. Modelli animali di IBD sembrano quindi adatti per identificare nuovi biomarcatori non invasivi per il monitoraggio della progressione della IBD, portando al tempo stesso a meglio comprendere la patogenesi di tale condizione, con evidente vantaggio per lo sviluppo di nuove terapie. Le osservazioni su modelli animali debbono naturalmente essere confermate con campioni da pazienti con IBD, prima che si possano trarre conclusioni definitive sulla validità di tali biomarcatori.

#### *Biomarcatori predittivi*

E' noto che dal 20% al 40% dei pazienti con artrite reumatoide non rispondono al trattamento con agenti bloccanti il fattore  $\alpha$  di necrosi tumorale, quali l'etanercept. Questi trattamenti farmacologici inappropriati non solo sono costosi, ma possono indurre gravi effetti collaterali in questo tipo di pazienti (49, 50). Pertanto, l'identificazione di biomarcatori che siano in grado di predire la risposta clinica al trattamento mediante il fattore  $\alpha$  di necrosi tumorale potrebbe essere estremamente utile. A tal fine si ritiene che la valutazione di pannelli di citochine plasmatiche potrebbe essere importante per differenziare i "responders" dai "non-responders". Fabre et al. hanno studiato i profili delle citochine plasmatiche in pazienti con artrite reumatoide in terapia con etanercept (49). E' stato utilizzato il Biochip Array Evidence (Randox Laboratories) per misurare 10 citochine proinfiammatorie e 2 citochine antiinfiammatorie nei campioni sierici raccolti al tempo 0 e dopo 90 giorni. I ricercatori hanno trovato che la risposta al farmaco era associata a elevate concentrazioni plasmatiche di MCP-1 e EGF. Inoltre, la combinazione di proteina C-reattiva e EGF era in grado di predire gli effetti del trattamento con etanercept a 3 mesi di distanza (sensibilità, 87,5%; specificità, 75%).

Allen et al. (51) hanno osservato che le concentrazioni plasmatiche delle citochine modulate dal fattore nucleare  $\kappa$ B e di diversi fattori di crescita (IL 6, IL 8, oncogene 1 regolato dalla crescita, fattore di crescita vascolare endoteliale e HGF) cambiavano nei pazienti con carcinoma a cellule squamose del capo-collo che erano stati trattati mediante chemioterapia e radioterapia. Tali parametri plasmatici erano determinati nei campioni da pazienti con una diagnosi di carcinoma orofaringeo allo stadio III o IV al fine di vedere se queste molecole correlassero con risposta al trattamento, recidiva o sopravvivenza (51). I pazienti venivano trattati mediante chemioterapia e radioterapia combinate, e la relazione tra le concentrazioni plasmatiche di citochine e

il tempo di sopravvivenza era analizzata mediante i modelli di analisi proporzionale dei rischi di Cox e mediante il test di sopravvivenza di Kaplan-Meier. L'analisi dettagliata dei dati ottenuti ha dimostrato che le concentrazioni di queste citochine correlavano sia con la risposta alla terapia che con la diminuita sopravvivenza. L'astinenza dal fumo e aumentati livelli del fattore di crescita dell'endotelio vascolare correlavano con un aumento della sopravvivenza. Questo approccio si presta parimenti ad essere esteso allo studio di altri tumori a prognosi sfavorevole, dal momento che la sorveglianza dei cambiamenti longitudinali delle concentrazioni delle citochine può integrarsi con le informazioni provenienti dalla sorveglianza clinica e dalle tecniche di "imaging".

#### *Profilo delle vie di trasduzione del segnale*

Le chinasi sono un gruppo molto interessante di obiettivi molecolari per il trattamento dei tumori dal momento che esse sono coinvolte, tra l'altro, nella regolazione della proliferazione e del differenziamento cellulare. Un'analisi sistematica di queste proteine di segnale in campioni di vari tumori può rivelare molti agenti causali durante la progressione della malattia (14, 52, 53). L'utilizzo di tecniche di microdissezione con laser può risolvere il problema della eterogeneità tissutale, rendendo possibile l'isolamento di cellule tumorali pure da sezioni di tessuto (14). Wulfkühle et al. hanno impiegato RPPM insieme a tecniche di microdissezione con laser per effettuare un'analisi sistematica delle vie di segnale cellulari in tessuti di tumori della mammella e in lesioni metastatiche (20). Nel loro lavoro hanno esaminato 25 campioni chirurgici di cancro mammario, andando a ricercare 90 molecole segnale. E' stato possibile definire sottogruppi di campioni di tumori primari della mammella e di lesioni metastatiche in base alla loro produzione di proteine o al grado di fosforilazione sulla base di specifiche vie di trasduzione del segnale, quali quella della famiglia delle EGFR, della via di attivazione AKT/mTOR, della via del fattore di crescita c-kit/abl o della via di attivazione di ERK. Gli Autori hanno proposto che la caratterizzazione dettagliata delle attività di segnale abbia un'enorme potenzialità per la messa a fuoco di regimi terapeutici adattati al singolo paziente. Mediante un approccio simile, Sheehan et al. (54) hanno disegnato le attività di segnale dei comportamenti epiteliali e stromali di carcinomi del colon. Gli Autori, sulla base degli schemi di produzione di oltre 60 molecole di segnale, hanno concluso che in questo tipo di tumore ha luogo uno scambio coordinato di informazioni tra epitelio e stroma, ipotizzando che alla base possa esserci una transizione tra epitelio e mesenchima e che tale scambio di informazioni possa dare origine a un epitelio tumorale resistente alle terapie. Tali dati, generati con "microarray" proteici, potrebbero avere forte rilievo nella messa a punto di trattamenti terapeutici per il cancro del colon (54).



### Approccio basato sulla biologia dei sistemi

La biologia dei sistemi è un'area di ricerca interdisciplinare focalizzata allo studio sistematico delle interazioni complesse nei sistemi biologici e allo sviluppo di modelli meccanicistici capaci di predire il comportamento di sistemi dinamici. In confronto agli approcci riduzionistici, che studiano ambiti spaziali o unità organizzative più ristrette per comprendere la natura dei sistemi complessi, l'approccio basato sulla biologia dei sistemi si fonda sull'integrazione di una gran serie di dati di genomica e proteomica, uniti a un'ampia serie di conoscenze biologiche e a tecniche computazionali. Il gran numero di parametri, variabili e vincoli nelle reti cellulari richiede l'utilizzo di tecniche di analisi numerica e computazionali. Gli sforzi fatti con l'approccio della biologia dei sistemi sono pertanto focalizzati a definire approfondimenti dettagliati in tutti i fattori che regolano una cellula vivente e nei cambiamenti che hanno luogo durante la progressione di una malattia (55). In questa luce, i "microarray" a proteine hanno dimostrato di essere uno dei metodi di larga scala capaci di fornire dati sperimentali in quantità sufficiente per le valutazioni computazionali (56). Knickerbocker et al. hanno studiato la mortalità precoce nei pazienti sottoposti a dialisi renale, applicando i "microarray" a proteine per quantificare una serie di parametri plasmatici nei campioni dei pazienti, combinando questi dati con variabili cliniche, quali indice di massa corporea, pressione diastolica, eventuali altre patologie, e ai metodi di accesso al circolo sanguigno (57). Gli Autori sono stati capaci di predire la mortalità precoce nei pazienti in dialisi quando i dati dei biomarcatori molecolari venivano integrati con i dati clinici. Un'analisi di questo tipo, basata sull'approccio della biologia dei sistemi, può essere utile per stabilire una prognosi personalizzata ed essere d'aiuto ai clinici nella scelta del miglior trattamento terapeutico per ogni singolo paziente.

### I "MICROARRAY" A PROTEINE PER LA VALIDAZIONE DEI BIOMARCATORI

Nell'ultimo decennio, le tecnologie proteomiche hanno portato alla identificazione di un gran numero di potenziali biomarcatori. Tuttavia, a causa delle attuali limitazioni nella validazione dei biomarcatori, solo un piccolo numero di essi è stato validato con successo. Questi biomarcatori includono l' $\alpha$ -fetoproteina, l'antigene carcinoembrionale e l'antigene prostatico specifico (58, 59). Numerosi aspetti del processo di validazione devono essere migliorati. Le attuali tecnologie impiegate per la scoperta dei biomarcatori utilizzano in realtà metodi a bassa produttività (60, 61). Pertanto, si rendono necessarie nuove tecnologie ad alta produttività e dotate di più alta sensibilità, dal momento che generalmente, soprattutto nel caso degli studi clinici, sono disponibili solo piccole quantità di campione (61). I "microarray" a proteine si sono dimostrati un eccellente approccio per gli studi di

validazione dei biomarcatori. Negli anni recenti, sono stati sviluppati diversi concetti di automazione per gli "array" a proteine. Uno dei formati più avanzati è il sistema immunochimico a biglie, per il quale diverse aziende hanno sviluppato sistemi automatizzati. Inoltre, i sistemi a "microarray" planari sono stati adattati alle micropiastre a 96 pozzetti, il che permette ai "microarray" di essere processati mediante sistemi robotizzati standard di pipettamento, anche con sistemi multicanale (22, 57, 62). Per altro, diverse aziende diagnostiche hanno sviluppato altre piattaforme per i "microarray" a proteine, quali il sistema a "biochip" Randox Evidence e la piattaforma professionale diagnostica IMPACT (Roche Diagnostics).

La più grande sfida nella validazione dei biomarcatori è rappresentata dalla disponibilità di molecole di cattura di elevata qualità, tipicamente anticorpi (22). A dispetto dei grandi sforzi messi in atto nello sviluppo di nuovi metodi per produrre molecole di cattura di elevata qualità, quali aptameri o anticorpi ricombinanti (36, 63, 64), il loro potenziale valore nella validazione dei biomarcatori deve essere ancora dimostrato.

### I "MICROARRAY" A PROTEINE E LA DIAGNOSTICA IN VITRO

I "microarray" a proteine sono di grande valore per scopi diagnostici (12, 65). Di fatto, numerosi "microarray" a proteine sono stati approvati dalla US "Food and Drug Administration" (FDA) o hanno ottenuto la marchiatura CE per il loro impiego all'interno della Comunità Europea (9). La diagnosi delle malattie autoimmuni, in particolare, è al centro della messa a punto di questi "microarray" a proteine, in sistemi quali AtheNA Multi-Lyte Test System (Zeus Scientific, commercializzato in esclusiva da Inverness Medical Professional Diagnostics), Bio-Plex 2200 (Bio-Rad Laboratories), Immuno Solid-phase Allergen Chip (VBC Genomics Bioscience Research) e QUANTA Plex ANCA Profile (INOVA Diagnostics). Il sistema AtheNA Multi-Lyte ANCA, che è in grado di effettuare analisi multiple su un singolo campione in un solo pozzetto, può effettuare analisi qualitative o semi-quantitative per anticorpi di classe IgG verso due anticorpi citoplasmatici anti-neutrofili (ANCA) diretti contro due antigeni (mieloperossidasi e oroteinasi 3). Lo scopo è quello di fornire uno strumento di ausilio diagnostico per un numero di disordini vascolari autoimmuni caratterizzati da un aumento della concentrazione degli ANCA. Il sistema AtheNA Multi-Lyte ANA effettua invece uno screening simultaneo di anticorpi antinucleo per 9 differenti specifici autoanticorpi (SSA, SSB, Sm, RNP, Scl-70, Jo-1, dsDNA, centromero B e istoni) in un singolo pozzetto.

Focus Diagnostics ha sviluppato due test sierologici (Plexus HerpeSelect 1 and 2 IgG test kit; Plexus EBV Multi-Analyte Diagnostics serology test kit) per la diagnosi infettivologica. La FDA ne ha approvato l'impiego rispettivamente nel 2007 e nel 2008. Il

sistema Plexus HerpeSelect 1 and 2 IgG test kit rappresenta il primo esempio di approccio "multiplex" per la sierologia del virus Herpes simplex che utilizza la tecnologia Luminex xMAP. Esso è in grado di rilevare anticorpi diretti verso i tipi 1 e 2 del virus Herpes simplex, e può essere di aiuto ai clinici nello scegliere i trattamenti e le strategie più adeguati. Il Plexus EBV Multi-Analyte Diagnostics serology test kit viene utilizzato per rilevare la presenza o l'assenza di anticorpi IgG o IgM nei campioni di siero umani. Viene impiegato per la diagnosi delle infezioni da virus di Epstein-Barr e per quella di mononucleosi associata a questo tipo di infezioni. Il sistema Randox Evidence Biochip Array effettua immunodosaggi "multiplex" miniaturizzati in un formato a "macroarray" con 25 diverse modalità, utilizzando una rivelazione mediante chemiluminescenza. Questo sistema a "biochip" completamente automatizzato permette di esaminare campioni da pazienti per una moltitudine di biomarcatori specifici per il settore della fertilità, delle malattie cardiache, dei tumori, delle citochine, dei fattori di crescita, delle molecole di adesione cellulare, della funzionalità tiroidea e delle droghe d'abuso. In particolare, il sistema ha ottenuto l'approvazione della FDA per le droghe d'abuso ed è al vaglio della stessa agenzia per l'approvazione degli altri analiti.

Si può quindi prevedere che un numero crescente di biomarcatori saranno definiti e applicati alla diagnostica in un prossimo futuro. A tal fine è indispensabile che vengano messi in atto sistemi rigorosi di controllo qualità e che il rilascio di dati non richiesti e l'utilizzo dei risultati diagnostici sia disciplinato da opportune regolamentazioni (66, 67). Questi gruppi di biomarcatori forniranno informazioni più individualizzate, che potranno essere di aiuto ai clinici nelle fasi di diagnosi e di selezione delle terapie più appropriate.

### PROSPETTIVE FUTURE

Nel futuro i sistemi di misura "multiplex" a proteine saranno sempre più accettati e implementati in diverse aree diagnostiche. Ulteriori sviluppi nella tecnologia dei "microarray" a proteine permetteranno di usare solo una goccia di sangue per esaminare i pazienti al fine di mettere in luce rilevanti informazioni patologiche, direttamente in ambulatorio, prima di prescrivere un dato farmaco. In questa luce, iniziative quali la "FDA's Critical Path Initiative" e la "Innovative Medicines Initiative", una cooperazione tra Comunità Europea e Federazione Europea delle Industrie e Associazioni Farmaceutiche rappresentano strategie per supportare lo sviluppo di nuovi test per biomarcatori, sia in ambito tipicamente diagnostico che a supporto dei processi di sviluppo di nuovi farmaci (68, 69).

Questi sforzi, supportati con fondi pubblici, sono stati concepiti per promuovere la collaborazione tra industrie, responsabili politici, istituti di ricerca e ospedali. Tali attività hanno il potenziale per accelerare lo sviluppo dei "microarray" a proteine ai fini diagnostici, affinché la medicina personalizzata possa divenire una realtà. Ciò nondimeno, saranno necessarie evidenze, che dimostrino

il reale bisogno clinico dei "microarray" diagnostici a proteine, che tali strumenti forniscono risultati rilevanti da un punto di vista terapeutico e che possono anche portare a una riduzione generale dei costi, prima che tali "array" possano finalmente soddisfare le grandi aspettative che hanno generato.

### BIBLIOGRAFIA

1. <http://www.personalizedmedicinecoalition.org>
2. van't Veer LJ, Bernards R. Enabling personalized cancer medicine through analysis of gene-expression patterns. *Nature* 2008;452:564-70.
3. Wong SH. Pharmacogenomics and personalized medicine. In: Dasgupta A, ed. *Handbook of drug monitoring methods: therapeutics and drugs of abuse*. New York: Humana Press, 2007:211-23.
4. Duffy MJ, Crown J. A personalized approach to cancer treatment: how biomarkers can help. *Clin Chem* 2008;54:1770-9.
5. Joos T, Kroeger P. New frontiers in microarray technology development. *Curr Opin Biotechnol* 2008;19:1-3.
6. Pollard HB, Srivastava M, Eidelman O, et al. Protein microarray platforms for clinical proteomics. *Proteomics Clin Appl* 2007;1:934-52.
7. Ramachandran N, Srivastava S, LaBaer J. Applications of protein microarrays for biomarker discovery. *Proteomics Clin Appl* 2008;2:1444-59.
8. Yu X, Xu D, Cheng Q. Label-free detection methods for protein microarrays. *Proteomics* 2006;6:5493-503.
9. Hartmann M, Roeraade J, Stoll D, et al. Protein microarrays for diagnostic assays. *Anal Bioanal Chem* 2009;393:1407-16.
10. Yu X, Schneiderhan-Marra N, Hsu HY, et al. Protein microarrays: effective tools for the study of inflammatory diseases. *Methods Mol Biol* 2009;577:199-214.
11. Gulmann C, Sheehan KM, Kay EW, et al. Array-based proteomics: mapping of protein circuitries for diagnostics, prognostics, and therapy guidance in cancer. *J Pathol* 2006;208:595-606.
12. Kingsmore SF. Multiplexed protein measurement: technologies and applications of protein and antibody arrays. *Nat Rev Drug Discov* 2006;5:310-20.
13. Pawlak M, Schick E, Bopp MA, et al. Zeptosens' protein microarrays: a novel high performance microarray platform for low abundance protein analysis. *Proteomics* 2002;2:383-93.
14. VanMeter AJ, Rodriguez AS, Bowman ED, et al. Laser capture microdissection and protein microarray analysis of human non-small cell lung cancer: differential epidermal growth factor receptor (EGFR) phosphorylation events associated with mutated EGFR compared with wild type. *Mol Cell Proteomics* 2008;7:1902-24.
15. Speer R, Wulfkuhle J, Espina V, et al. Molecular network analysis using reverse phase protein microarrays for patient tailored therapy. *Adv Exp Med Biol* 2008;610:177-86.
16. Espina V, Wulfkuhle J, Calvert VS, et al. Reverse phase protein microarrays for theranostics and patient-tailored therapy. *Methods Mol Biol* 2008;441:113-28.
17. Liotta LA, Petricoin EF. Putting the "bio" back into biomarkers: orienting proteomic discovery toward biology and away from the measurement platform. *Clin Chem* 2008;54:3-5.
18. Sturgeon CM, Hoffman BR, Chan DW, et al. National Academy of Clinical Biochemistry Laboratory Medicine Practice Guidelines for use of tumor markers in clinical practice: quality requirements. *Clin Chem* 2008;54:e1-10.

19. Mathivanan S, Ahmed M, Ahn NG, et al. Human Proteinpedia enables sharing of human protein data. *Nat Biotechnol* 2008;26:164-7.
20. Wulfschuhle JD, Speer R, Pierobon M, et al. Multiplexed cell signaling analysis of human breast cancer applications for personalized therapy. *J Proteome Res* 2008;7:1508-17.
21. Joos TO, Berger H. The long and difficult road to the diagnostic market: protein microarrays. *Drug Discov Today* 2006;11:959-61.
22. Zangar RC, Daly DS, White AM. ELISA microarray technology as a high-throughput system for cancer biomarker validation. *Expert Rev Proteomics* 2006;3:37-44.
23. Visintin I, Feng Z, Longton G, et al. Diagnostic markers for early detection of ovarian cancer. *Clin Cancer Res* 2008;14:1065-72.
24. Bertenshaw GP, Yip P, Sessaiah P, et al. Multianalyte profiling of serum antigens and autoimmune and infectious disease molecules to identify biomarkers dysregulated in epithelial ovarian cancer. *Cancer Epidemiol Biomarkers Prev* 2008;17:2872-81.
25. Amonkar SD, Bertenshaw GP, Chen TH, et al. Development and preliminary evaluation of a multivariate index assay for ovarian cancer. *PLoS ONE* 2009;4:e4599.
26. LaBaer J. So, you want to look for biomarkers (introduction to the special biomarkers issue). *J Proteome Res* 2005;4:1053-9.
27. Paczesny S, Krijanovski OI, Braun TM, et al. A biomarker panel for acute graft-versus-host disease. *Blood* 2009;113:273-8.
28. Carlsson A, Wingren C, Ingvarsson J, et al. Serum proteome profiling of metastatic breast cancer using recombinant antibody microarrays. *Eur J Cancer* 2008;44:472-80.
29. Pearlberg J, Degot S, Endege W, et al. Screens using RNAi and cDNA expression as surrogates for genetics in mammalian tissue culture cells. *Cold Spring Harb Symp Quant Biol* 2005;70:449-59.
30. Hudson ME, Pozdnyakova I, Haines K, et al. Identification of differentially expressed proteins in ovarian cancer using high-density protein microarrays. *Proc Natl Acad Sci USA* 2007;104:17494-9.
31. Ramachandran N, Raphael JV, Hainsworth E, et al. Next-generation high-density self-assembling functional protein arrays. *Nat Methods* 2008;5:535-8.
32. Hall DA, Ptacek J, Snyder M. Protein microarray technology. *Mech Ageing Dev* 2007;128:161-7.
33. Caron M, Choquet-Kastylevsky G, Joubert-Caron R. Cancer immunomics using autoantibody signatures for biomarker discovery. *Mol Cell Proteomics* 2007;6:1115-22.
34. Zhu H, Hu S, Jona G, et al. Severe acute respiratory syndrome diagnostics using a coronavirus protein microarray. *Proc Natl Acad Sci USA* 2006;103:4011-6.
35. Schmid KE, Keasey SL, Pittman P. Analysis of the human immune response to vaccinia by use of a novel protein microarray suggests that antibodies recognize less than 10% of the total viral proteome. *Proteomics Clin Appl* 2008;2:1528-38.
36. Ingvarsson J, Wingren C, Carlsson A, et al. Detection of pancreatic cancer using antibody microarray-based serum protein profiling. *Proteomics* 2008;8:2211-9.
37. Song XC, Fu G, Yang X, et al. Protein expression profiling of breast cancer cells by dissociable antibody microarray (DAMA) staining. *Mol Cell Proteomics* 2008;7:163-9.
38. Anderson KS, Ramachandran N, Wong J, et al. Application of protein microarrays for multiplexed detection of antibodies to tumor antigens in breast cancer. *J Proteome Res* 2008;7:1490-9.
39. Margolin K. Cytokine therapy in cancer. *Expert Opin Biol Ther* 2008;8:1495-05.
40. O'Shea JJ, Murray PJ. Cytokine signaling modules in inflammatory responses. *Immunity* 2008;28:477-87.
41. Zhu Q, Ziemssen F, Henke-Fahle S, et al. Vitreous levels of bevacizumab and vascular endothelial growth factor-A in patients with choroidal neovascularization. *Ophthalmology* 2008;115:1750-5.
42. Fujita K, Ewing CM, Sokoll LJ, et al. Cytokine profiling of prostatic fluid from cancerous prostate glands identifies cytokines associated with extent of tumor and inflammation. *Prostate* 2008;68:872-82.
43. Huang RP. An array of possibilities in cancer research using cytokine antibody arrays. *Expert Rev Proteomics* 2007;4:299-308.
44. Linkov F, Ferris RL, Yurkovetsky Z, et al. Multiplex analysis of cytokines as biomarkers that differentiate benign and malignant thyroid diseases. *Proteomics Clin Appl* 2008;2:1575-85.
45. Sauer G, Schneiderhan-Marra N, Kazmaier C, et al. Prediction of nodal involvement in breast cancer based on multiparametric protein analyses from preoperative core needle biopsies of the primary lesion. *Clin Cancer Res* 2008;14:3345-53.
46. Kim BK, Lee JW, Park PJ, et al. The multiplex bead array approach to identifying serum biomarkers associated with breast cancer. *Breast Cancer Res* 2009;11:R22.
47. Bozza FA, Salluh JI, Japiassu AM, et al. Cytokine profiles as markers of disease severity in sepsis: a multiplex analysis. *Crit Care* 2007;11:R49.
48. Torrence AE, Brabb T, Viney JL, et al. Serum biomarkers in a mouse model of bacterial-induced inflammatory bowel disease. *Inflamm Bowel Dis* 2008;14:480-90.
49. Fabre S, Dupuy AM, Dossat N, et al. Protein biochip array technology for cytokine profiling predicts etanercept responsiveness in rheumatoid arthritis. *Clin Exp Immunol* 2008;153:188-95.
50. Fabre S, Guisset C, Tatem L, et al. Protein biochip array technology to monitor rituximab in rheumatoid arthritis. *Clin Exp Immunol* 2009;155:395-402.
51. Allen C, Duffy S, Teknos T, et al. Nuclear factor-B-related serum factors as longitudinal biomarkers of response and survival in advanced oropharyngeal carcinoma. *Clin Cancer Res* 2007;13:3182-90.
52. Calvert VS, Collantes R, Elariny H, et al. A systems biology approach to the pathogenesis of obesity-related nonalcoholic fatty liver disease using reverse phase protein microarrays for multiplexed cell signaling analysis. *Hepatology* 2007;46:166-72.
53. Petricoin EF, 3<sup>rd</sup>, Espina V, Araujo RP, et al. Phosphoprotein pathway mapping: Akt/mammalian target of rapamycin activation is negatively associated with childhood rhabdomyosarcoma survival. *Cancer Res* 2007;67:3431-40.
54. Sheehan KM, Gulmann C, Eichler GS, et al. Signal pathway profiling of epithelial and stromal compartments of colonic carcinoma reveals epithelial-mesenchymal transition. *Oncogene* 2008;27:323-31.
55. Weston AD, Hood L. Systems biology, proteomics, and the future of health care: toward predictive, preventative, and personalized medicine. *J Proteome Res* 2004;3:179-96.
56. Albeck JG, MacBeath G, White FM, et al. Collecting and organizing systematic sets of protein data. *Nat Rev Mol Cell Biol* 2006;7:803-12.
57. Knickerbocker T, Chen JR, Thadhani R, et al. An integrated approach to prognosis using protein microarrays and nonparametric methods. *Mol Syst Biol* 2007;3:123.

58. Polanski M, Anderson NL. A list of candidate cancer biomarkers for targeted proteomics. *Biomark Insights* 2007;1:1-48.
59. Anderson KS, LaBaer J. The sentinel within: exploiting the immune system for cancer biomarkers. *J Proteome Res* 2005;4:1123-33.
60. Rifai N, Gillette MA, Carr SA. Protein biomarker discovery and validation: the long and uncertain path to clinical utility. *Nat Biotechnol* 2006;24:971-83.
61. Zhang X. Biomarker validation: movement towards personalized medicine. *Expert Rev Mol Diagn* 2007;7:469-71.
62. Servoss SL, Gonzalez R, Varnum S, et al. High-throughput analysis of serum antigens using sandwich ELISAs on microarrays. *Methods Mol Biol* 2009;520:143-50.
63. Xu D, Yu X, Liu Z, et al. Label-free electrochemical detection for aptamer-based array electrodes. *Anal Chem* 2005;77:5107-13.
64. Taussig MJ, Stoevesandt O, Borrebaeck CA, et al. ProteomeBinders: planning a European resource of affinity reagents for analysis of the human proteome. *Nat Methods* 2007;4:13-7.
65. Kricka LJ, Master SR, Joos TO, et al. Current perspectives in protein array technology. *Ann Clin Biochem* 2006;43:457-67.
66. Kricka LJ, Master SR. Validation and quality control of protein microarray-based analytical methods. *Mol Biotechnol* 2008;38:19-31.
67. Master SR, Bierl C, Kricka LJ. Diagnostic challenges for multiplexed protein microarrays. *Drug Discov Today* 2006;11:1007-11.
68. Woodcock J, Woosley R. The FDA Critical Path Initiative and its influence on new drug development. *Annu Rev Med* 2008;59:1-12.
69. Bril A, Canet E. The Innovative Medicine Initiative (IMI). *Med Sci* 2008;24:885-90.
